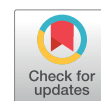

# Professional Practice Committee: *Standards of Medical Care in Diabetes—2019*

*Diabetes Care* 2019;42(Suppl. 1):S3 | <https://doi.org/10.2337/dc19-SPPC01>

The Professional Practice Committee (PPC) of the American Diabetes Association (ADA) is responsible for the “Standards of Medical Care in Diabetes,” referred to as the Standards of Care. The PPC is a multidisciplinary expert committee comprised of physicians, diabetes educators, and others who have expertise in a range of areas, including adult and pediatric endocrinology, epidemiology, public health, lipid research, hypertension, preconception planning, and pregnancy care. Appointment to the PPC is based on excellence in clinical practice and research. Although the primary role of the PPC is to review and update the Standards of Care, it may also be involved in ADA statements, reports, and reviews.

The ADA adheres to the National Academy of Medicine Standards for Developing Trustworthy Clinical Practice Guidelines. All members of the PPC are required to disclose potential conflicts of interest with industry and/or other relevant organizations. These disclosures are discussed at the onset of each Standards of Care revision meeting. Members of the committee, their employers, and their disclosed conflicts of interest are listed in the “Disclosures: *Standards of Medical Care in Diabetes—2019*” table (see pp. S184–S186). The ADA funds development of the Standards of Care out of its general revenues and does not use industry support for this purpose.

For the current revision, PPC members systematically searched MEDLINE for human studies related to each section and published since 15 October 2017. Recommendations were revised based on new evidence or, in some cases, to clarify the prior recommendation or match the strength of the wording to the strength of the evidence. A table linking the changes in recommendations to new evidence can be reviewed at [professional.diabetes.org/SOC](http://professional.diabetes.org/SOC). The Standards of Care was approved by ADA’s Board of Directors, which includes health care professionals, scientists, and lay people.

Feedback from the larger clinical community was valuable for the 2018 revision of the Standards of Care. Readers who wish to comment on the 2019 Standards of Care are invited to do so at [professional.diabetes.org/SOC](http://professional.diabetes.org/SOC).

The PPC would like to thank the following individuals who provided their expertise in reviewing and/or consulting with the committee: *Ann Albright, PhD, RD; Pamela Allweiss, MD, MPH; Barbara J. Anderson, PhD; George Bakris, MD; Richard Bergenstal, MD; Stuart Brink, MD; Donald R. Coustan, MD; Ellen D. Davis, MS, RN, CDE, FADE; Jesse Dinh, PharmD; Steven Edelman, MD; Barry H. Ginsberg, MD, PhD; Irl B. Hirsch, MD; Scott Kahan, MD, MPH; David Klonoff, MD; Joyce Lee, MD, MPH; Randie Little, PhD; Alexandra Migdal, MD; Anne Peters, MD; Amy Rothberg, MD; Jennifer Sherr, MD, PhD; Hood Thabit, MB, BCh, MD, PhD; Stuart Alan Weinzimer, MD; and Neil White, MD.*

## Members of the PPC

Joshua J. Neumiller, PharmD, CDE, FASCP\* (Chair)  
Christopher P. Cannon, MD  
Jill Crandall, MD  
David D’Alessio, MD  
Ian H. de Boer, MD, MS\*  
Mary de Groot, PhD  
Judith Fradkin, MD  
Kathryn Evans Kreider, DNP, APRN, FNP-BC, BC-ADM  
David Maahs, MD, PhD  
Nisa Maruthur, MD, MHS  
Medha N. Munshi, MD\*  
Maria Jose Redondo, MD, PhD, MPH  
Guillermo E. Umpierrez, MD, CDE, FACE, FACP\*  
Jennifer Wyckoff, MD  
\*Subgroup leaders

## ADA Nutrition Consensus Report Writing Group—Liaison

Melinda Maryniuk, MEd, RDN, CDE

## American College of Cardiology—Designated Representatives (Section 10)

Sandeep Das, MD, MPH, FACC  
Mikhail Kosiborod, MD, FACC

## ADA Staff

Erika Gebel Berg, PhD  
(corresponding author: [eberg@diabetes.org](mailto:eberg@diabetes.org))  
Mindy Saraco, MHA  
Matthew P. Petersen  
Sacha Uelmen, RDN, CDE  
Shamera Robinson, MPH, RDN  
William T. Cefalu, MD
